# Supplementary material
Source: publisher site journal article supplement (https://www.dovepress.com/article/supplementary_file/605250/605250_Supplementary%20Materials_1.docx)
Supplement: Supplementary file 1 [file 605250_Supplementary%20Materials_1.docx]

**
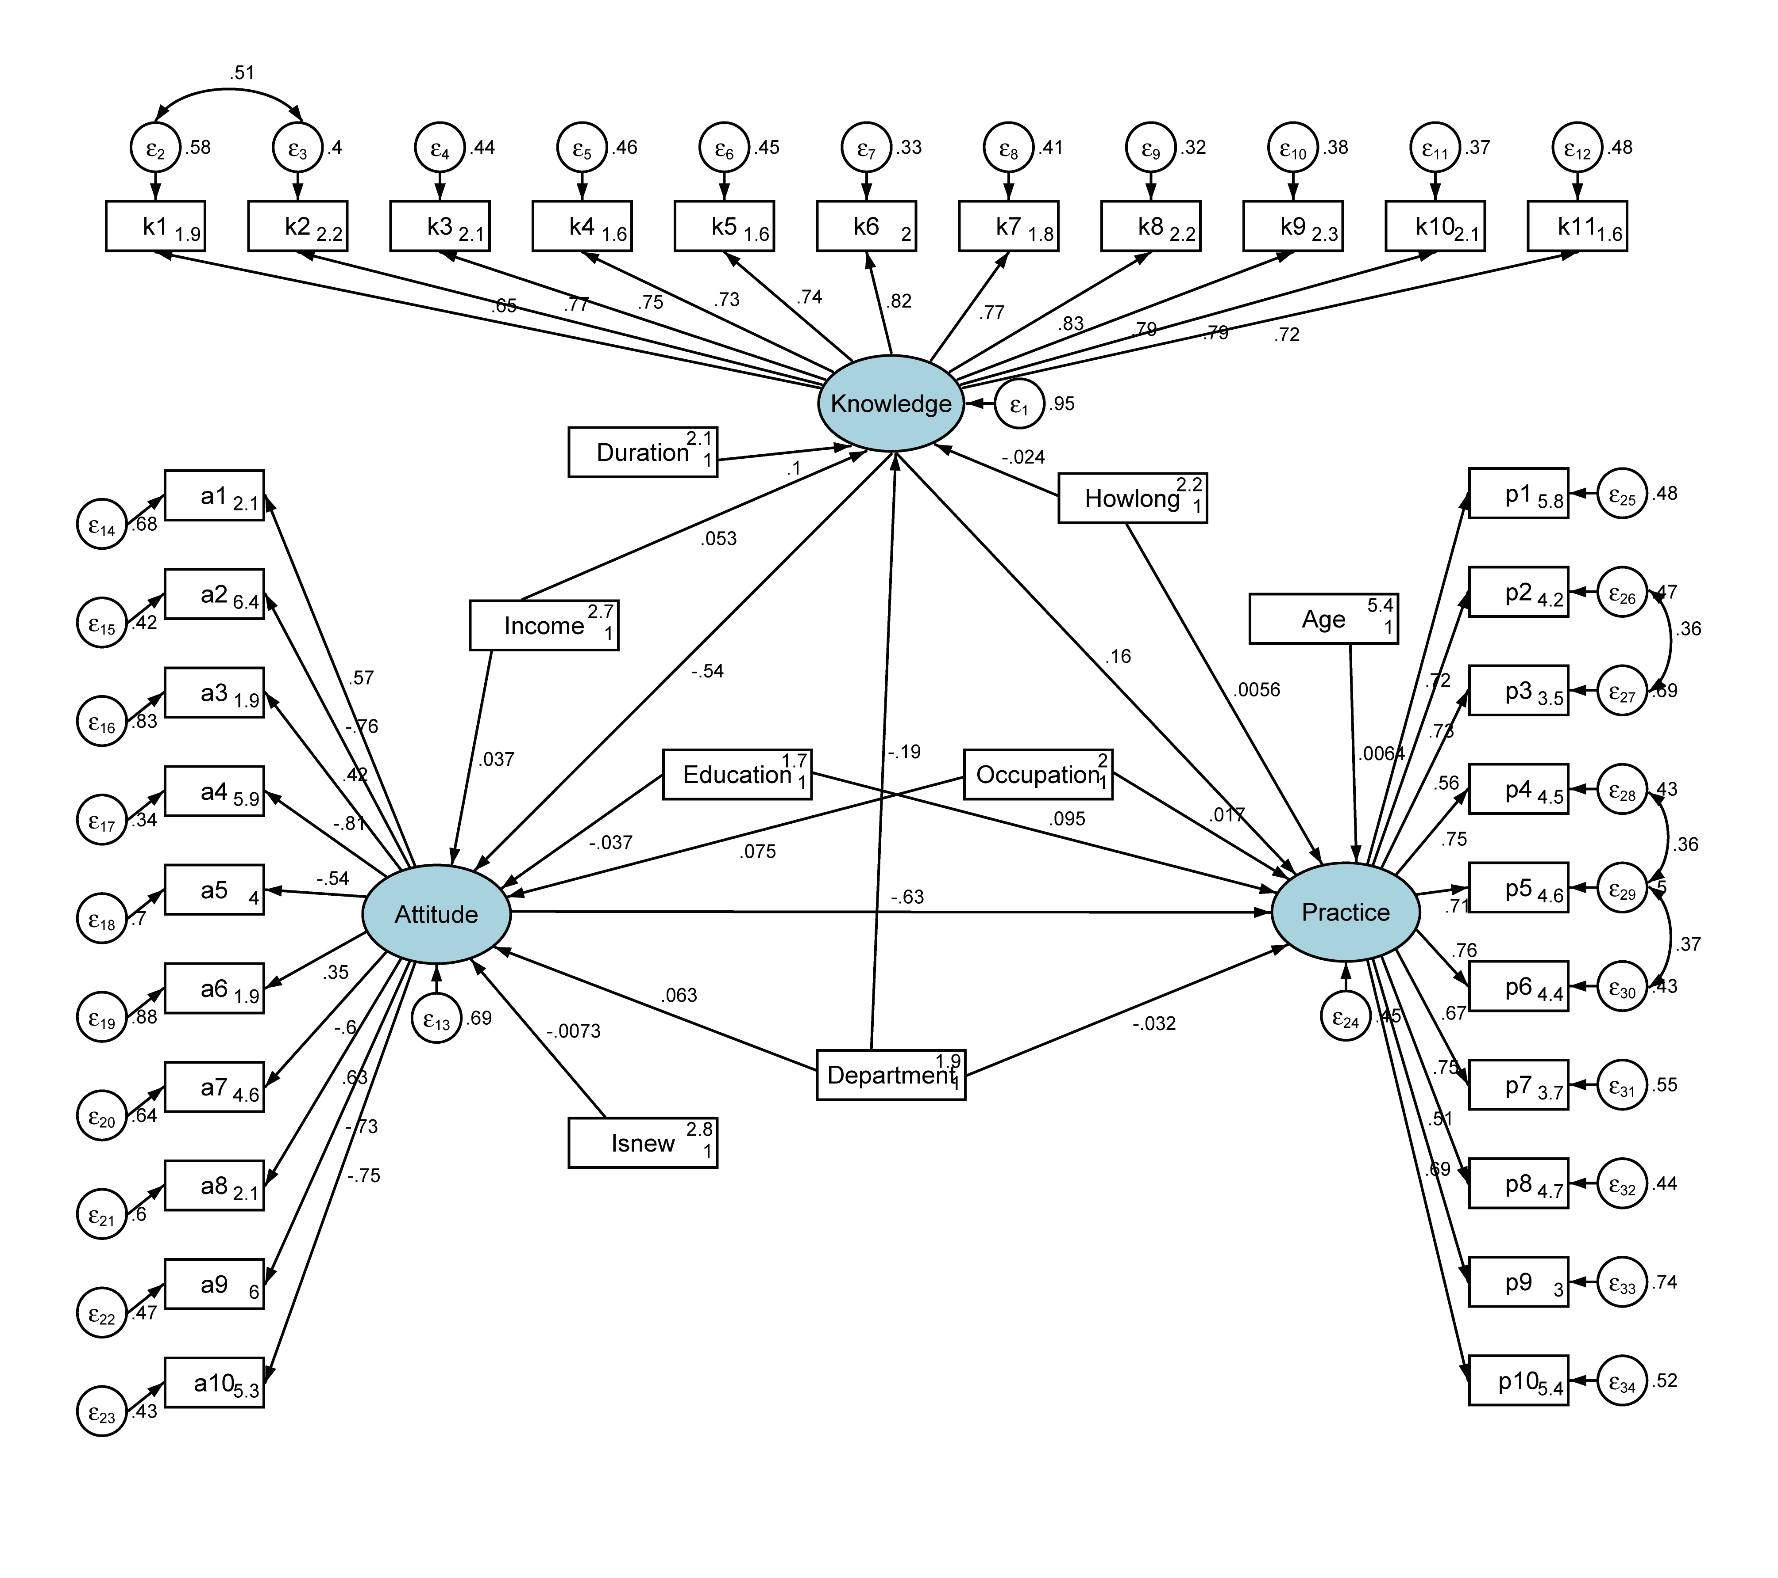
**

**Figure S1.** Structural equation modeling of the initial model. Oval shapes represent latent variables. The measured variables are drawn in rectangular shapes. The circles with the caption starting with ‘e’ indicate measurement errors in each observed variable. Solid straight lines refer to direct effects, while curved solid lines represent indirect effects. Each number on the arrows indicates an individual standardized regression coefficient of each dependency.

**
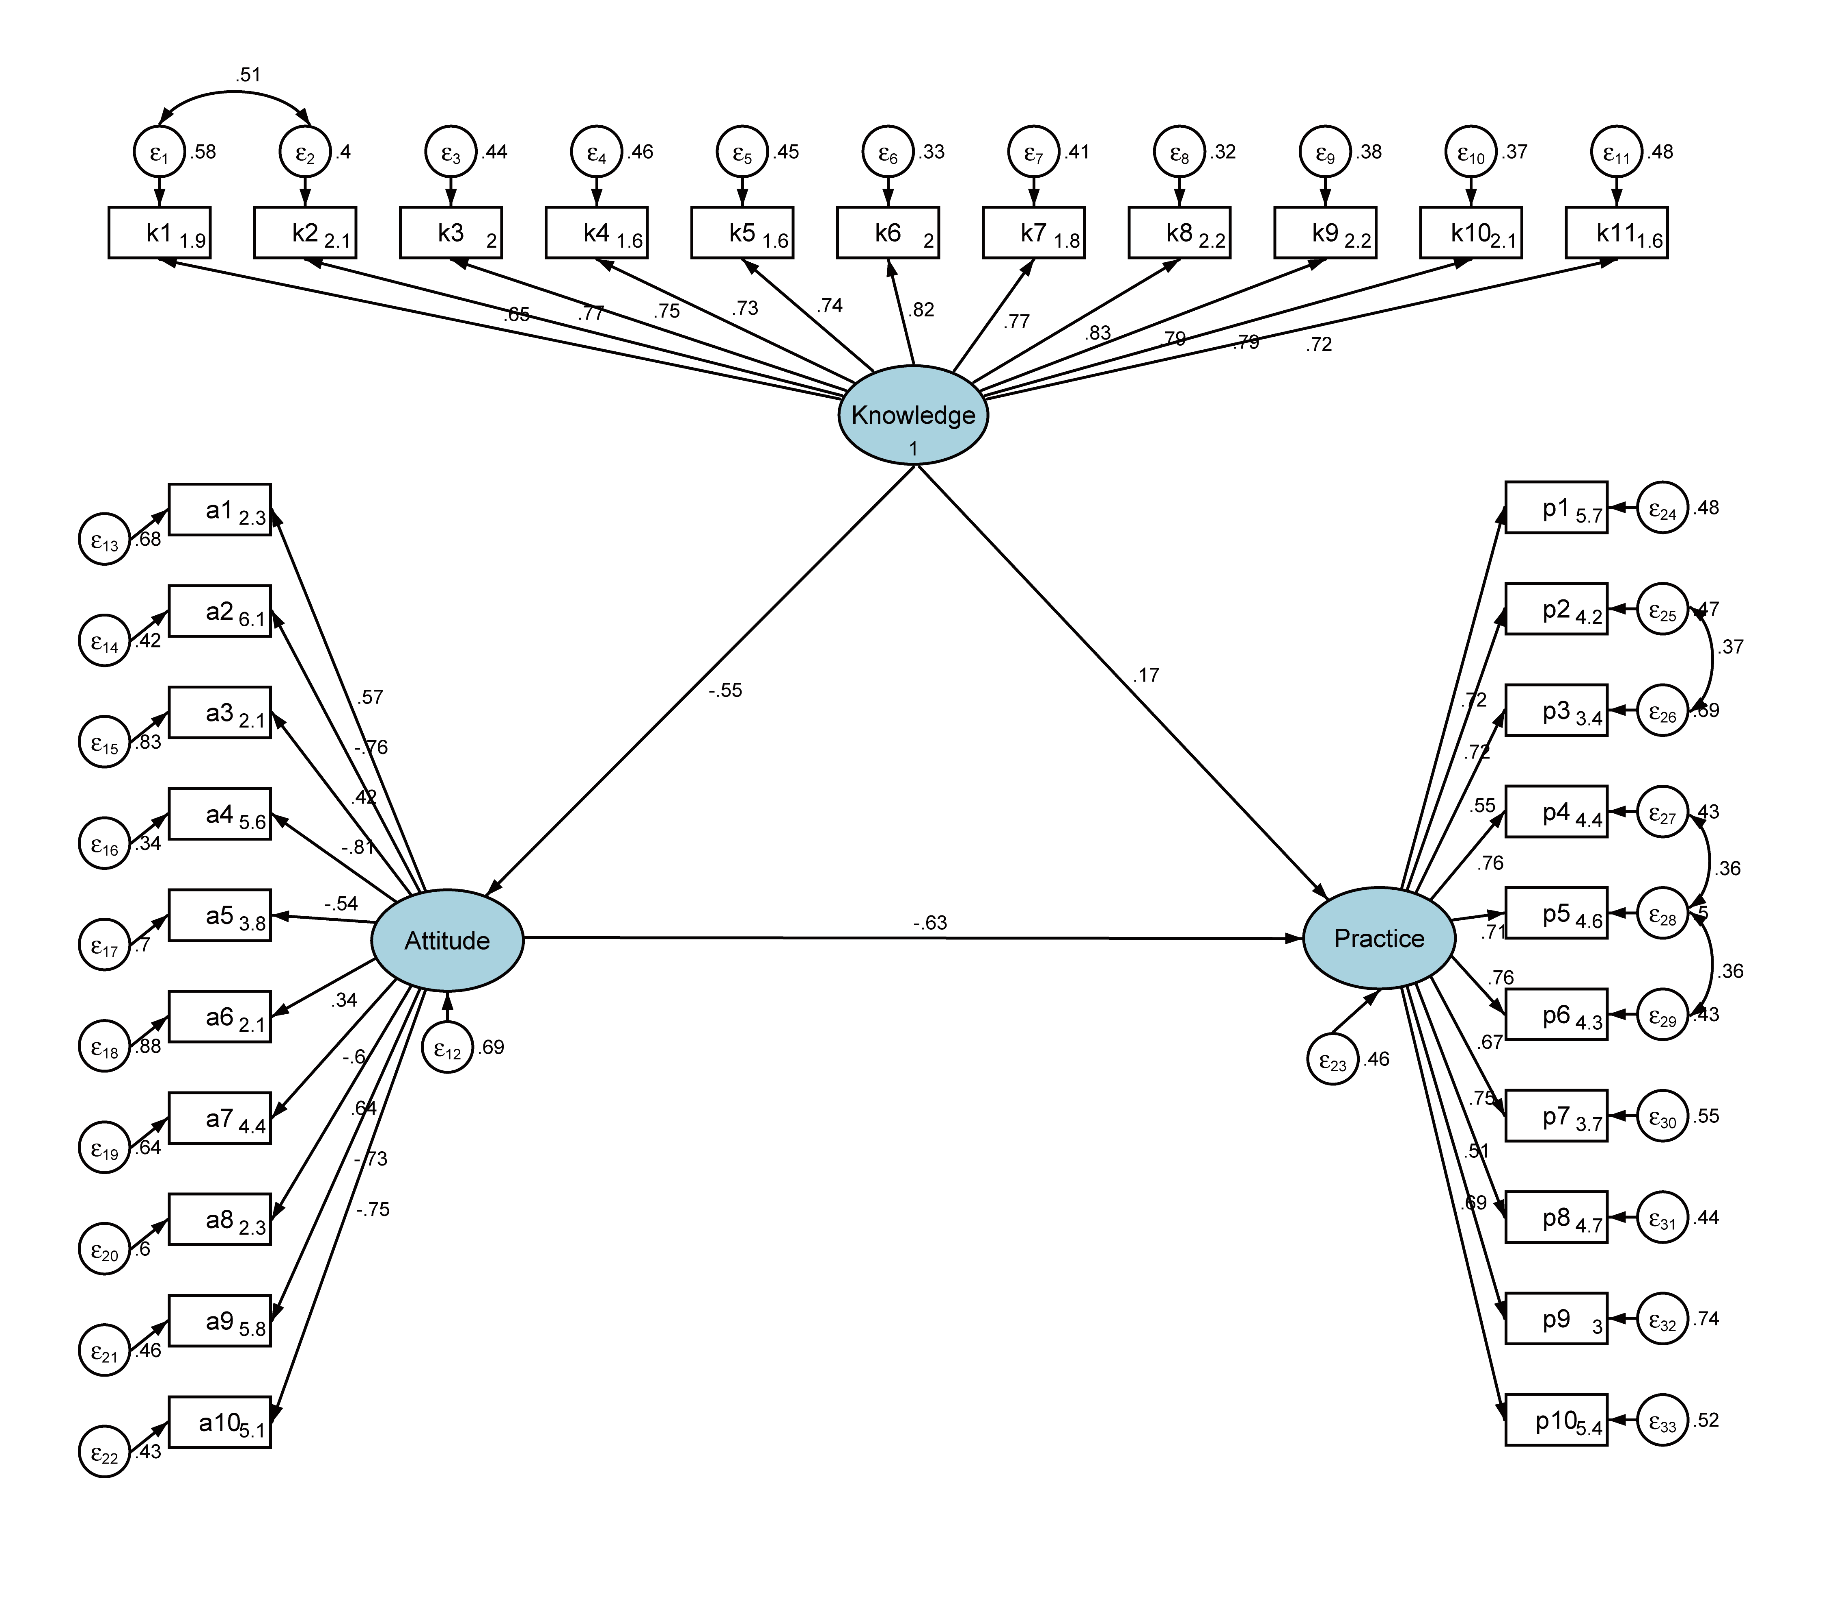
**

**Figure S2.** Structural equation modeling without covariates (sensitivity analysis). Oval shapes represent latent variables. The measured variables are drawn in rectangular shapes. The circles with the caption starting with ‘e’ indicate measurement errors in each observed variable. Solid straight lines refer to direct effects, while curved solid lines represent indirect effects. Each number on the arrows indicates an individual standardized regression coefficient of each dependency.

**Table S1. Analysis stratified on the department of first consultation**

| Variables | Hematology | Non-hematology | P interaction |
| --- | --- | --- | --- |
| Knowledge mean | 14.55 ± 5.63 | 12.62 ± 5.59 | <0.001 |
| Attitude mean | 33.23 ± 2.54 | 32.48 ± 3.25 | 0.003 |
| Practice mean | 41.04 ± 6.61 | 38.95 ± 7.09 | 0.001 |
| K→A correlation | 0.252 | 0.384 | 0.127 |
| K→P correlation | 0.496 | 0.435 | 0.422 |
| A→P correlation | 0.357 | 0.560 | 0.007 |

**Table S2. SEM model fit indicators of the initial model**

| **Indicators** | **Reference** | **Results** |
| --- | --- | --- |
| RMSEA | <0.08 | 0.074 |
| SRMR | <0.08 | 0.065 |
| TLI | >0.80 | 0.806 |
| CFI | >0.80 | 0.820 |

RMSEA: Root means square error of approximation; SRMR: Standardized root means square residual; TLI: Tucker-Lewis’s index; CFI: Comparative fit index.

**Table S3. SEM model fit indicators of the final model after removing non‑significant paths and re‑estimating the model**

| **Indicators** | **Reference** | **Results** |
| --- | --- | --- |
| RMSEA | <0.08 | 0.071 |
| SRMR | <0.08 | 0.068 |
| TLI | >0.80 | 0.814 |
| CFI | >0.80 | 0.828 |

RMSEA: Root means square error of approximation; SRMR: Standardized root means square residual; TLI: Tucker-Lewis’s index; CFI: Comparative fit index.

**Table S4. Direct and indirect effect of SEM analysis of the initial model**

| Model paths | | Total effects | | Direct effects | | Indirect effects | |
| --- | --- | --- | --- | --- | --- | --- | --- |
| β (95%CI) | P | β (95%CI) | P | β (95%CI) | P |
| Knowledge |  |  |  |  |  |  |  |
|  | Income | 0.053 (-0.042, 0.148) | 0.275 | 0.053 (-0.042, 0.148) | 0.275 |  |  |
|  | Duration of diseases | **0.104 (0.002, 0.205)** | **0.046** | **0.104 (0.002, 0.205)** | **0.046** |  |  |
|  | Duration of diagnosis after first symptoms | -0.024 (-0.126, 0.078) | 0.646 | -0.024 (-0.126, 0.078) | 0.646 |  |  |
|  | First-visit department | **-0.190 (-0.288, -0.092)** | **<0.001** | **-0.190 (-0.288, -0.092)** | **<0.001** |  |  |
| Attitude |  |  |  |  |  |  |  |
|  | Knowledge | **-0.539 (-0.671,-0.407)** | **<0.001** | **-0.539 (-0.671,-0.407)** | **<0.001** |  |  |
|  | Education | -0.037 (-0.140,0.066) | 0.483 | -0.037 (-0.140,0.066) | 0.483 |  |  |
|  | Occupation | 0.075 (-0.015,0.165) | 0.100 | 0.075 (-0.015,0.165) | 0.100 |  |  |
|  | Income | 0.008 (-0.102,0.119) | 0.884 | 0.037 (-0.063,0.137) | 0.471 | -0.029 (-0.080,0.023) | 0.277 |
|  | Duration of diseases | **-0.056 (-0.112,0.000)** | **0.049** |  |  | **-0.056 (-0.112,0.000)** | **0.049** |
|  | Duration of diagnosis after first symptoms | 0.013 (-0.042,0.068) | 0.647 |  |  | 0.013 (-0.042,0.068) | 0.647 |
|  | First-visit department | **0.166 (0.065,0.266)** | **0.001** | 0.063 (-0.024,0.151) | 0.155 | **0.102 (0.046,0.159)** | **<0.001** |
|  | Newly diagnosed | -0.007 (-0.093,0.078) | 0.867 | -0.007 (-0.093,0.078) | 0.867 |  |  |
| Practice |  |  |  |  |  |  |  |
|  | Knowledge | **0.495 (0.379,0.611)** | **<0.001** | **0.158 (0.060,0.256)** | **0.002** | **0.337 (0.246,0.428)** | **<0.001** |
|  | Attitude | **-0.625 (-0.769,-0.482)** | **<0.001** | **-0.625 (-0.769,-0.482)** | **<0.001** |  |  |
|  | Age | 0.006 (-0.078,0.091) | 0.883 | 0.006 (-0.078,0.091) | 0.883 |  |  |
|  | Education | **0.118 (0.018,0.218)** | **0.021** | 0.095 (0.013,0.177) | 0.023 | 0.023 (-0.042,0.088) | 0.483 |
|  | Occupation | -0.030 (-0.125,0.064) | 0.530 | 0.017 (-0.065,0.099) | 0.689 | -0.047 (-0.104,0.009) | 0.102 |
|  | Income | 0.003 (-0.074,0.080) | 0.935 |  |  | 0.003 (-0.074,0.080) | 0.935 |
|  | Duration of diseases | **0.051 (0.000,0.102)** | **0.049** |  |  | **0.051 (0.000,0.102)** | **0.049** |
|  | Duration of diagnosis after first symptoms | -0.006 (-0.096,0.084) | 0.893 | 0.006 (-0.070,0.081) | 0.884 | -0.012 (-0.062,0.039) | 0.646 |
|  | First-visit department | **-0.166 (-0.266,-0.066)** | **0.001** | -0.032 (-0.109,0.044) | 0.408 | **-0.134 (-0.207,-0.061)** | **<0.001** |
|  | Newly diagnosed | 0.005 (-0.049,0.058) | 0.867 |  |  | 0.005 (-0.049,0.058) | 0.867 |

Bolded P-values are statistically significant (P<0.05).

**Table S5. Direct and indirect effect of SEM analysis of the final model**

| **Model paths** | | Total effects | | Direct effects | | Indirect effects | |
| --- | --- | --- | --- | --- | --- | --- | --- |
| β (95%CI) | P | β (95%CI) | P | β (95%CI) | P |
| Knowledge |  |  |  |  |  |  |  |
|  | Duration of diseases | **0.097 (0.001,0.192)** | **0.047** | **0.097 (0.001,0.192)** | **0.047** |  |  |
|  | First-visit department | **-0.198 (-0.296,-0.101)** | **<0.001** | **-0.198 (-0.296,-0.101)** | **<0.001** |  |  |
| Attitude |  |  |  |  |  |  |  |
|  | Knowledge | **-0.554 (-0.687,-0.422)** | **<0.001** | **-0.554 (-0.687,-0.422)** | **<0.001** |  |  |
|  | Duration of diseases | -0.054 (-0.107,0.000) | 0.051 |  |  | -0.054 (-0.107,0.000) | 0.051 |
|  | First-visit department | **0.110 (0.053,0.167)** | **<0.001** |  |  | **0.110 (0.053,0.167)** | **<0.001** |
| Practice |  |  |  |  |  |  |  |
|  | Knowledge | **0.512 (0.395,0.629)** | **<0.001** | **0.164 (0.066,0.262)** | **0.001** | **0.348 (0.256,0.441)** | **<0.001** |
|  | Attitude | **-0.628 (-0.772,-0.484)** | **<0.001** | **-0.628 (-0.772,-0.484)** | **<0.001** |  |  |
|  | Education | **0.091 (0.017,0.165)** | **0.016** | **0.091 (0.017,0.165)** | **0.016** |  |  |
|  | Duration of diseases | **0.050 (0.000,0.099)** | **0.050** |  |  | **0.050 (0.000,0.099)** | **0.050** |
|  | First-visit department | **-0.102 (-0.154,-0.049)** | **<0.001** |  |  | **-0.102 (-0.154,-0.049)** | **<0.001** |

Bolded P-values are statistically significant (P<0.05).

**Table S6. SEM model fit indicators of the final model after excluding the covariates (sensitivity analysis)**

| **Indicators** | **Reference** | **Results** |
| --- | --- | --- |
| RMSEA | <0.08 | 0.077 |
| SRMR | <0.08 | 0.071 |
| TLI | >0.80 | 0.819 |
| CFI | >0.80 | 0.833 |

RMSEA: Root means square error of approximation; SRMR: Standardized root means square residual; TLI: Tucker-Lewis’s index; CFI: Comparative fit index.

**Table S7. Direct and indirect effect of SEM analysis of the final model after excluding the covariates (sensitivity analysis)**

| **Model paths** | | Total effects | | Direct effects | | Indirect effects | |
| --- | --- | --- | --- | --- | --- | --- | --- |
| β (95%CI) | P | β (95%CI) | P | β (95%CI) | P |
| Attitude |  |  |  |  |  |  |  |
|  | Knowledge | **-0.553 (-0.627,-0.480)** | **<0.001** | **-0.553 (-0.627,-0.480)** | **<0.001** |  |  |
| Practice |  |  |  |  |  |  |  |
|  | Knowledge | **0.514 (0.437,0.592)** | **<0.001** | **0.165 (0.070,0.260)** | **0.001** | **0.349 (0.280,0.418)** | **<0.001** |
|  | Attitude | **-0.631 (-0.715,-0.546)** | **<0.001** | **-0.631 (-0.715,-0.546)** | **<0.001** |  |  |

Bolded P-values are statistically significant (P<0.05).

**Supplementary questionnaire**

| Dear Friend,  We are researchers from Ruian People's Hospital, sincerely inviting you to participate in our study. This research aims to understand the knowledge, attitudes, and practices of patients with multiple myeloma regarding the disease. The findings will provide a basis for developing scientific early intervention strategies, which may help more people in the future and improve patient health outcomes. Participation in this study is voluntary, and if you agree to participate, please refer to the following instructions:  1.Please complete the questionnaire. There are no right or wrong answers; simply answer honestly. If you encounter any questions during the process, feel free to ask us. Once completed, please submit the questionnaire promptly.  2.This study is a simple survey and will not harm your physical or mental health. However, it may involve some private information, such as your gender and age. We will strictly keep this information confidential and will not disclose it. Please feel assured to provide truthful responses.  3.As a participant, you may request information about the study and its progress at any time. If you decide to withdraw from the study, please inform us, and your data will not be included in the research results.  Finally, we sincerely thank you for taking the time to support our scientific research!  □I acknowledge and agree that the collected data may be used for scientific research.  Signature of informed consent:  Date of participation：      Year      Month      Day | | | | | | | | | | | |
| --- | --- | --- | --- | --- | --- | --- | --- | --- | --- | --- | --- |
| **Part 1 Basic Information** | | | | | | | | | | | |
| 1. **Your age: ___ years old** | | | | | | | | | | | |
| 1. **Your gender:** | | a. Male  b. Female | | | | | | | | | |
| 1. **Place of residence：** | | a. Rural  b. Urban  c. Suburban | | | | | | | | | |
| 1. **Education level：** | | a. Primary school or below b. Middle school c. High school/Technical school d. Associate degree e. Bachelor's degree or above | | | | | | | | | |
| 1. **Your occupation type:** | | a. Long-term stable employment (fixed job) b. Temporary work c. Freelancer d. Unemployed/Jobless e. Retired f. Other | | | | | | | | | |
| 1. **Your household's per capita monthly income (in yuan):** | | a.<2000  b.2000-4999  c.5000-9999  d.≥10000 | | | | | | | | | |
| 1. **Duration of your multiple myeloma diagnosis (from first onset to present):** | | a. <1 year b. 1-3 years c. 3-5 years d. 5-10 years e. >10 years | | | | | | | | | |
| 1. **After the first onset of symptoms, how long did it take for a diagnosis of multiple myeloma?** | | a. <1 week b. 1-2 weeks c. 2 weeks-1 month d. >1 month | | | | | | | | | |
| 1. **Which department did you first visit for multiple myeloma?** | | a. Hematology b. Orthopedics c. Nephrology d. Other | | | | | | | | | |
| 1. **Are you a newly diagnosed or recurrent multiple myeloma patient?** | | a. Newly diagnosed b. Recurrent | | | | | | | | | |
| 1. **What treatments have you undergone after being diagnosed with multiple myeloma? (Select all that apply)** | | a. No treatment received b. Medication (including chemotherapy) c. Hematopoietic stem cell transplantation d. Other | | | | | | | | | |
| 1. **Have you been diagnosed with any of the following complications by a doctor? (Select all that apply)** | | a. No complications b. Bone disease (fractures, etc.) c. Infections (including herpes zoster virus infection) d. Peripheral neuropathy (numbness, pain in limbs, etc.) e. Venous thrombosis | | | | | | | | | |
| 1. **20+20=50** | | a. True b. False | | | | | | | | | |
| **Part 2 Knowledge of Multiple Myeloma** | | | | | | | | | |
| 1. **Multiple myeloma is not a hereditary disease, but the risk of the disease may increase for other family members of the patient.** | | | | | a. Understand | | b. Partially understand | | c. Do not understand | | |
| 1. **The main manifestations of multiple myeloma include elevated blood calcium, kidney dysfunction, anemia, bone pain, or easy fractures.** | | | | | a. Understand | | b. Partially understand | | c. Do not understand | | |
| 1. **Patients with multiple myeloma are more prone to infections and symptoms such as fever than normal individuals.** | | | | | a. Understand | | b. Partially understand | | c. Do not understand | | |
| 1. **Venous thromboembolism is one of the major complications of multiple myeloma.** | | | | | a. Understand | | b. Partially understand | | c. Do not understand | | |
| 1. **Autologous hematopoietic stem cell transplantation is a common treatment method for multiple myeloma.** | | | | | a. Understand | | b. Partially understand | | c. Do not understand | | |
| 1. **Multiple myeloma can be treated with chemotherapy, and its side effects include fatigue, nausea, vomiting, diarrhea, and limb numbness.** | | | | | a. Understand | | b. Partially understand | | c. Do not understand | | |
| 1. **Patients with multiple myeloma who have kidney dysfunction may require hemodialysis when necessary.** | | | | | a. Understand | | b. Partially understand | | c. Do not understand | | |
| 1. **Patients with multiple myeloma should pay attention to self-protection management, including frequent hand washing, proper ventilation, and maintaining social distancing.** | | | | | a. Understand | | b. Partially understand | | c. Do not understand | | |
| 1. **Patients with multiple myeloma should maintain a reasonable diet, ensuring daily nutritional intake with light and balanced meals.** | | | | | a. Understand | | b. Partially understand | | c. Do not understand | | |
| 1. **Before engaging in exercise, multiple myeloma patients should undergo medical evaluations by professionals, including assessments of bone density, fall risk, and cardiopulmonary function.** | | | | | a. Understand | | b. Partially understand | | c. Do not understand | | |
| 1. **Patients with multiple myeloma should have regular follow-ups, and remote consultations through the internet can be utilized.** | | | | | a. Understand | | b. Partially understand | | c. Do not understand | | |
| **Part 3 Attitudes Towards Multiple Myeloma** | | | | | | | | | | | |
| 1. **I believe that multiple myeloma has caused a significant negative impact on my life.** | | a. Strongly agree | b. Agree | c. Neutral | | d. Disagree | | e. Strongly disagree | | | |
| 1. **I believe that a better understanding of the disease is crucial for treatment and prognosis.** | | a. Strongly agree | b. Agree | c. Neutral | | d. Disagree | | e. Strongly disagree | | | |
| 1. **I believe that multiple myeloma will not relapse once it is successfully treated.** | | a. Strongly agree | b. Agree | c. Neutral | | d. Disagree | | e. Strongly disagree | | | |
| 1. **I am satisfied with the decisions made by doctors in the diagnosis and management of multiple myeloma.** | | a. Strongly agree | b. Agree | c. Neutral | | d. Disagree | | e. Strongly disagree | | | |
| 1. **I am willing to accept hemodialysis when necessary during the course of the disease.** | | a. Strongly agree | b. Agree | c. Neutral | | d. Disagree | | e. Strongly disagree | | | |
| 1. **I find it difficult to accept chemotherapy during the course of the disease.** | | a. Strongly agree | b. Agree | c. Neutral | | d. Disagree | | e. Strongly disagree | | | |
| 1. **I am willing to accept long-term outpatient maintenance treatment after hospitalization.** | | a. Strongly agree | b. Agree | c. Neutral | | d. Disagree | | e. Strongly disagree | | | |
| 1. **I feel anxious about the economic burden caused by the disease.** | | a. Strongly agree | b. Agree | c. Neutral | | d. Disagree | | e. Strongly disagree | | | |
| 1. **I believe that scientific and standardized self-management helps improve the quality of life for patients with multiple myeloma, delays disease progression, and extends survival time.** | | a. Strongly agree | b. Agree | c. Neutral | | d. Disagree | | e. Strongly disagree | | | |
| 1. **I am confident in my ability to perform self-management for multiple myeloma.** | | a. Strongly agree | b. Agree | c. Neutral | | d. Disagree | | e. Strongly disagree | | | |

| **Part 4 Behavioral Practices Regarding Multiple Myeloma**  Occurs 8 times or more out of 10: Always; Occurs 5–7 times out of 10: Often; Occurs 3–4 times out of 10: Sometimes; Occurs 1–2 times out of 10: Occasionally; Occurs 0 times out of 10: Never | | | | | |
| --- | --- | --- | --- | --- | --- |
| 1. **I follow the prescribed treatment for multiple myeloma.** | a. Always | b. Often | c. Sometimes | d. Occasionally | e. Never |
| 1. **I pay attention to side effects that occur during treatment.** | a. Always | b. Often | c. Sometimes | d. Occasionally | e. Never |
| 1. **I monitor symptoms related to venous thrombosis daily, such as shortness of breath, hemoptysis, chest pain, or unilateral limb pain and swelling.** | a. Always | b. Often | c. Sometimes | d. Occasionally | e. Never |
| 1. **I practice self-protection measures such as frequent hand washing, proper ventilation, maintaining social distancing, and avoiding unnecessary gatherings and outings.** | a. Always | b. Often | c. Sometimes | d. Occasionally | e. Never |
| 1. **I manage my diet carefully, maintain a balanced diet, and ensure adequate nutritional intake.** | a. Always | b. Often | c. Sometimes | d. Occasionally | e. Never |
| 1. **I actively work on adjusting my psychological state.** | a. Always | b. Often | c. Sometimes | d. Occasionally | e. Never |
| 1. **I engage in appropriate physical exercise as guided by professionals.** | a. Always | b. Often | c. Sometimes | d. Occasionally | e. Never |
| 1. **I store and take antitumor medications appropriately under the guidance of healthcare professionals.** | a. Always | b. Often | c. Sometimes | d. Occasionally | e. Never |
| 1. **I participate in courses on managing multiple myeloma.** | a. Always | b. Often | c. Sometimes | d. Occasionally | e. Never |
| 1. **I attend follow-up appointments and consultations regularly.** | a. Always | b. Often | c. Sometimes | d. Occasionally | e. Never |
